# Supplementary material
Source: bioRxiv or medRxiv preprint supplement (https://medrxiv.org/highwire/filestream/71241/field_highwire_adjunct_files/0/2020.01.15.20017236-1.pdf)
Supplement: Supplementary file [file 2020.01.15.20017236-1.pdf]

## Supplementary Information

### Cerebrospinal fluid p-tau217 performs better than p-tau181 as a biomarker of Alzheimer's disease

**Supplementary Table 1.** Spearman correlations between CSF p-tau, p-tau/t-tau and regional [<sup>18</sup>F]flortaucipir.

|                           | Braak I/II ROI           | Braak III/IV ROI         | Braak V/VI ROI           | Inferior temporal cortex |
|---------------------------|--------------------------|--------------------------|--------------------------|--------------------------|
| <b>All (n=184)</b>        |                          |                          |                          |                          |
| p-tau217                  | <b>0.752 (&lt;0.001)</b> | <b>0.734 (&lt;0.001)</b> | <b>0.620 (&lt;0.001)</b> | <b>0.698 (&lt;0.001)</b> |
| p-tau181                  | <b>0.706 (&lt;0.001)</b> | <b>0.687 (&lt;0.001)</b> | <b>0.572 (&lt;0.001)</b> | <b>0.650 (&lt;0.001)</b> |
| p-tau217/t-tau            | <b>0.778 (&lt;0.001)</b> | <b>0.774 (&lt;0.001)</b> | <b>0.660 (&lt;0.001)</b> | <b>0.740 (&lt;0.001)</b> |
| p-tau181/t-tau            | <b>0.741 (&lt;0.001)</b> | <b>0.752 (&lt;0.001)</b> | <b>0.625 (&lt;0.001)</b> | <b>0.720 (&lt;0.001)</b> |
| <b>CU (n=63)</b>          |                          |                          |                          |                          |
| p-tau217                  | <b>0.410 (0.001)</b>     | 0.212 (0.095)            | 0.011 (0.932)            | 0.212 (0.096)            |
| p-tau181                  | <b>0.330 (0.008)</b>     | 0.208 (0.102)            | 0.017 (0.895)            | 0.214 (0.093)            |
| p-tau217/t-tau            | <b>0.472 (&lt;0.001)</b> | 0.234 (0.065)            | 0.048 (0.710)            | 0.240 (0.058)            |
| p-tau181/t-tau            | <b>0.379 (0.002)</b>     | <b>0.264 (0.036)</b>     | 0.090 (0.481)            | <b>0.301 (0.016)</b>     |
| <b>MCI-AD (n=28)</b>      |                          |                          |                          |                          |
| p-tau217                  | 0.663 (<0.001)           | <b>0.535 (0.003)</b>     | <b>0.460 (0.014)</b>     | <b>0.483 (0.009)</b>     |
| p-tau181                  | 0.550 (0.002)            | 0.324 (0.093)            | 0.302 (0.118)            | 0.276 (0.155)            |
| p-tau217/t-tau            | 0.620 (<0.001)           | <b>0.599 (0.001)</b>     | <b>0.472 (0.011)</b>     | <b>0.560 (0.002)</b>     |
| p-tau181/t-tau            | 0.534 (0.002)            | <b>0.403 (0.033)</b>     | 0.345 (0.072)            | 0.361 (0.059)            |
| <b>AD dementia (n=40)</b> |                          |                          |                          |                          |
| p-tau217                  | 0.288 (0.071)            | <b>0.552 (&lt;0.001)</b> | <b>0.535 (&lt;0.001)</b> | <b>0.549 (&lt;0.001)</b> |
| p-tau181                  | 0.300 (0.060)            | <b>0.400 (0.011)</b>     | <b>0.358 (0.023)</b>     | <b>0.399 (0.011)</b>     |
| p-tau217/t-tau            | 0.238 (0.138)            | <b>0.760 (&lt;0.001)</b> | <b>0.742 (&lt;0.001)</b> | <b>0.768 (&lt;0.001)</b> |
| p-tau181/t-tau            | 0.206 (0.202)            | <b>0.399 (0.011)</b>     | <b>0.318 (0.046)</b>     | <b>0.420 (0.007)</b>     |

Data are shown as Spearman correlation coefficients (p-value). Significant results are shown in bold. AD, Alzheimer's disease; CU, cognitively unimpaired; MCI, mild cognitive impairment; ROI, region of interest.

**Supplementary Table 2.** Demographic and clinical characteristics of validation cohort.

|                         | Amyloid Positive Mild AD<br>n=32 |
|-------------------------|----------------------------------|
| Age, <i>years</i>       | 73 (8)                           |
| Sex F/M, <i>n</i>       | 13/19                            |
| Education, <i>years</i> | 15 (2)                           |
| MMSE                    | 23 (2)                           |
| p-tau217, <i>pg/ml</i>  | 918 (773)                        |
| p-tau181, <i>pg/ml</i>  | 442 (313)                        |

Data are shown as mean (SD) unless otherwise specified.

AD, Alzheimer's disease dementia; F, female; M, male; MMSE, Mini Mental State Examinations.

**Supplementary Table 3.** Performance of the p-tau217 and p-tau181 assays.

| Sample                | Mean concentration, pg/ml | SD    | N  | % CV |
|-----------------------|---------------------------|-------|----|------|
| <b>p-tau217</b>       |                           |       |    |      |
| 10 pg/mL QC           | 9.97                      | 0.59  | 22 | 5.95 |
| 50 pg/mL QC           | 44.31                     | 2.06  | 22 | 4.66 |
| High Control Sample   | 737.99                    | 40.96 | 22 | 5.55 |
| Medium Control Sample | 328.72                    | 17.81 | 22 | 5.42 |
| Low Control Sample    | 59.69                     | 4.93  | 22 | 8.26 |
| <b>p-tau181</b>       |                           |       |    |      |
| 10 pg/mL QC           | 9.49                      | 0.24  | 22 | 2.53 |
| 50 pg/mL QC           | 45.84                     | 1.05  | 22 | 2.29 |
| High Control Sample   | 379.61                    | 21.25 | 22 | 5.60 |
| Medium Control Sample | 190.27                    | 7.29  | 22 | 3.83 |
| Low Control Sample    | 71.19                     | 3.92  | 22 | 5.51 |

CV, coefficient of variation; QC, quality control; SD, standard deviation.
